# Supplementary material
Source: PubMed Central journal article supplement (PMC8237697)
Supplement: NIHMS1712069-supplement-6.pdf [file NIHMS1712069-supplement-6.pdf]

## APPENDIX

Supplementary Table 1. Study Outcome Definitions

| Study Outcome                                                               | Definition                                                                                                                                                                                                                                                                                                                                   |
|-----------------------------------------------------------------------------|----------------------------------------------------------------------------------------------------------------------------------------------------------------------------------------------------------------------------------------------------------------------------------------------------------------------------------------------|
| Neonatal mortality                                                          | The percentage of infants who die either during their hospital stay after delivery or up to three years of life.                                                                                                                                                                                                                             |
| Composite neonatal morbidity                                                | A composite outcome of the percentage of infants affected by any of the included adverse perinatal outcomes: RDS, BPD/CLD, IVH, PVL, NEC or neonatal sepsis.                                                                                                                                                                                 |
| Respiratory distress syndrome (RDS)                                         | Defined based on clinical criteria, such as tachypnea, chest wall retractions, grunting, and supplemental oxygen requirement, and based on radiological criteria with poor lung expansion on chest x-ray classified as RDS                                                                                                                   |
| Bronchopulmonary dysplasia (BPD)/ chronic lung disease of prematurity (CLD) | Oxygen supplementation required at 36 weeks' postmenstrual age or the presence of chronic respiratory distress and oxygen requirement beyond 28 days of life accompanied by a chest radiograph that showed chronic abnormalities such as persistent streaks of increased density in both lungs interspersed with normal or hyperlucent areas |
| Intraventricular hemorrhage (IVH)                                           | Bleeding within the ventricular system of the brain as defined by Papile's classification, <sup>21</sup> with the majority of studies including grades 3 and 4                                                                                                                                                                               |
| Periventricular leukomalacia (PVL)                                          | Necrosis of white matter near the lateral ventricles diagnosed by cranial ultrasonography                                                                                                                                                                                                                                                    |
| Necrotizing enterocolitis (NEC)                                             | Intestines in premature infants become infected causing partial or full-thickness necrosis of the bowel                                                                                                                                                                                                                                      |
| Neonatal sepsis                                                             | Positive blood cultures and/or need for intravenous antibiotics administration for a minimum of 7 days                                                                                                                                                                                                                                       |

### Search Strategies

#### Ovid Medline

Date Searched: 6/11/2019; 5/13/20

Applied Database Supplied Limits: n/a

Number of Results: 2643; 2783

Search strategy was re-run on May 13, 2020. 140 additional citations found

#### Full Search Strategy:

(ACS).ti,ab. OR ((antenatal\* OR prenatal\*) ADJ3 (corticosteroid\* OR corticoid\* OR glucocorticoid\* OR glucorticoid\* OR steroid\* OR CST)).ti,ab. OR ((adrenal cortex) ADJ1 (hormone\*) ADJ2 (prenatal\* OR antenatal\*)).ti,ab. OR ((prenatal\* OR antenatal\*) ADJ2 (Betamethasone OR adbeon OR becasone OR beprogel OR beta methason OR betacortril OR betadexamethasone OR betametasone OR betamethasolone OR betamethazone OR betnasol OR betnelan OR betnesol OR betnovate OR betsolan OR betsolon OR betsopart OR celestan OR celestene OR celeston\* OR cellederm OR cidoten OR dermobet OR diprolen OR flubenisolone OR flubenisolonvalerate OR methasone OR rinderon OR walacort)).ti,ab. OR ((prenatal\* OR antenatal\*) ADJ2 (Dexamethasone OR adrecort OR adrenocot OR aroseb dex OR aflucoson\* OR alfalyl OR anaflogistico OR arcodexan\* OR artrosone OR auxison OR azium OR bidexol OR calonat OR cebedex OR cetadexon OR colofam OR corsona OR cortastat OR cortidex\* OR cortidexason OR cortidrona OR cortidrone OR cortisumman OR dacortina fuerte OR dacortine fuerte OR dalalone OR danasone OR de-sone la OR decacortin OR decadeltona OR decadeltonone OR decaderm OR decadion OR decadrin OR decadron\* OR decaesadril OR decaject OR decameth\* OR decasone OR decaspray OR decasterolone OR decdan OR decilone OR decofluor OR dectancyl OR dekcort OR delladec OR deltafluoren\* OR dergramin OR deronil OR desacort OR desacortone OR desadrene OR desalark OR desameton\* OR desigdron OR dexa cortisyl OR dexa dabrosan OR dexa korti OR dexa scherosan OR dexa scherozon OR dexa scherozone OR dexa p OR dexacen 4 OR dexachel OR dexacort\* OR dexadabrosan OR dexadecadrol OR dexadrol OR dexagel OR dexagen OR dexahelvacort OR dexakorti OR dexalien OR dexalocal OR dexame OR dexamecortin OR

dexameson\* OR dexametason\* OR dexamonozon OR dexan\* OR dexapot OR dexascheroson OR dexascherozon\* OR dexason\* OR dexinoral OR dexionil OR dexmethsone OR dexona OR dexone OR dexpak taperpak OR dextelan OR dextrasone OR dexycu OR dezone OR dibasona OR dexamethasone OR esacortene OR exadion OR exadione OR firmalone OR fluormethyl prednisolone OR fluormethylprednisolon\* OR fluormone OR fluorocort OR fluorodelta OR fluoromethylprednisolone OR fortecortin OR gammacorten\* OR grosodexon\* OR hexadecadiol OR hexadecadrol OR hexadiol OR hexadrol OR isnacort OR isopto\* OR lokalison f OR loverine OR luxazone OR marvidione OR maxidex OR mediamethasone OR megacortin OR mephameson\* OR metasolon\* OR methazon\* OR methylfluorprednisolone OR metisone lafi OR mexasone OR millicorten\* OR mymethasone OR neoforderx OR neofordex OR nisomethasona OR novocort OR oftan dexa OR opticorten OR opticortinol OR oradexan OR oradexon\* OR orgadrone OR ozurdex OR pidexon OR policort OR posurdex OR predni f OR prednisolone f OR prodexona OR prodexone OR sanamethasone OR santenson OR santeson OR sawasone OR solurex OR spoloven OR sterasone OR thilodexine OR tobradex OR triamcimetil OR vexamet OR visumetazone OR visumethazone).ti,ab. OR (((prenatal\* OR antenatal\*).hw. OR ((prenatal\* OR antenatal\* OR fetal OR foetal OR intrauterine OR maternal) ADJ1 (drug exposure)).ti,ab.) AND (exp adrenal cortex hormones/ OR exp glucocorticoids/ OR exp betamethasone/ OR exp dexamethasone/ OR ((adrenal cortex) ADJ1 (hormone\*)).ti,ab. OR (Corticotherap\* OR corticosteroid\* OR corticoid\* OR Glucocorticoid\* OR glucorticoid\* OR Betamethasone OR adbeon OR becasone OR beprogel OR beta methason OR betacortril OR betadexamethasone OR betametason OR betamethasolone OR betamethazone OR betnasol OR betnelan OR betnesol OR betnovate OR betsolan OR betsolon OR betsoport OR celestan OR celestene OR celeston\* OR celledoderm OR cidoten OR dermobet OR diprolen OR flubenisolone OR flubenisolonvalerate OR methasone OR rinderon OR walacort OR Dexamethasone OR adrecort OR adrenocot OR aereoseb dex OR aflucoson\* OR alfalyl OR anaflogistico OR arcodexan\* OR artrosone OR auxison OR azium OR bidexol OR calonat OR cebedex OR cetadexon OR colofom OR corsona OR cortastat OR cortidex\* OR cortidexason OR cortidrona OR cortidrone OR cortisumman OR dacortina fuerte OR dacortine fuerte OR dalalone OR danasone OR de-sone la OR decacortin OR decadeltona OR decadeltona OR decaderm OR decadion OR decadrone OR decadron\* OR decaesadriol OR decaject OR decameth\* OR decasone OR decaspray OR decasterolone OR decdan OR decilone OR decofluor OR dectancyl OR dekacort OR delladec OR deltafluoren\* OR dergramin OR deronil OR desacort OR desacortone OR desadrene OR desalark OR desameton\* OR desigdron OR dexa cortisyl OR dexa dabrosan OR dexa korti OR dexa scherosan OR dexa scherozon OR dexa scherozone OR dexa p OR dexacen 4 OR dexachel OR dexacort\* OR dexadabrosan OR dexadecadrol OR dexadrol OR dexagel OR dexagen OR dexahelvacort OR dexakorti OR dexalien OR dexalocal OR dexame OR dexamecortin OR dexameson\* OR dexametason\* OR dexamonozon OR dexan\* OR dexapot OR dexascheroson OR dexascherozon\* OR dexason\* OR dexinoral OR dexionil OR dexmethsone OR dexona OR dexone OR dexpak taperpak OR dextelan OR dextrasone OR dexycu OR dezone OR dibasona OR dexamethasone OR esacortene OR exadion OR exadione OR firmalone OR fluormethyl prednisolone OR fluormethylprednisolon\* OR fluormone OR fluorocort OR fluorodelta OR fluoromethylprednisolone OR fortecortin OR gammacorten\* OR grosodexon\* OR hexadecadiol OR hexadecadrol OR hexadiol OR hexadrol OR isnacort OR isopto\* OR lokalison f OR loverine OR luxazone OR marvidione OR maxidex OR mediamethasone OR megacortin OR mephameson\* OR metasolon\* OR methazon\* OR methylfluorprednisolone OR metisone lafi OR mexasone OR millicorten\* OR mymethasone OR neoforderx OR neofordex OR nisomethasona OR novocort OR oftan dexa OR opticorten OR opticortinol OR oradexan OR oradexon\* OR orgadrone OR ozurdex OR pidexon OR policort OR posurdex OR predni f OR prednisolone f OR prodexona OR prodexone OR sanamethasone OR santenson OR santeson OR sawasone OR solurex OR spoloven OR sterasone OR thilodexine OR tobradex OR triamcimetil OR vexamet OR visumetazone OR visumethazone).ti,ab.))

AND

(exp Fetal Growth Retardation/ OR exp Infant, Low Birth Weight/ OR exp Obstetric Labor, Premature OR exp Infant, Premature/ OR exp Birth Weight/ OR (birthweight\* OR prematuritas OR small for gestational age).ti,ab. OR ((premature OR preterm\*) ADJ2 (birth\* OR labor\* OR labour\* OR delivery OR deliveries OR infant\* OR neonate\* OR newborn\* OR baby OR babies OR childbirth\* OR fetus\*).ti,ab. OR ((pre-mature OR pre-term\*) ADJ2 (birth\* OR labor\* OR labour\* OR delivery OR deliveries OR infant\* OR neonate\* OR newborn\* OR baby OR babies OR childbirth\*).ti,ab. OR ((birth\* OR neonat\* OR newborn OR infant\*) ADJ1 (weight\* OR underweight)).ti,ab. OR ((SGA) ADJ1 (neonate OR infant\* OR fetus\* OR newborn\*).ti,ab. OR ((small for date) ADJ3 (baby\* OR babies OR infant\* OR neonat\* OR fetus\*).ti,ab. OR ((small for age) ADJ3 (baby\* OR babies OR infant\* OR neonat\* OR fetus\*).ti,ab. OR ((fetal OR neonat\* OR infant\* OR fetus OR foetal OR in utero OR intrauterine OR prenatal) ADJ2 (growth) ADJ2 (restrict\* OR retardation OR disorder\*).ti,ab.) NOT ((exp Animals/) not (exp Animals/ and exp Humans/))

Embase

Date Searched: 6/11/19, 5/13/20

Applied Database Supplied Limits: n/a

Number of Results: 4184; 4422

Search was re-run on May 13, 2020. Additional 238 results.

Full Search Strategy:

'prematurity'/exp OR 'birth weight'/exp OR 'intrauterine growth retardation'/exp OR 'premature labor'/exp OR 'premature birth'/de OR 'fetal growth retardation'/de OR (birthweight\* OR prematuritas OR 'small for gestational age'):ti,ab OR ((premature OR preterm\*) NEAR/2 (birth\* OR labor\* OR labour\* OR delivery OR deliveries OR infant\* OR neonate\* OR newborn\* OR baby OR babies OR childbirth\* OR fetus\*)):ti,ab OR ((pre-mature OR pre-term\*) NEAR/2 (birth\* OR labor\* OR labour\* OR delivery OR deliveries OR infant\* OR neonate\* OR newborn\* OR baby OR babies OR childbirth\*)):ti,ab OR ((birth\* OR neonat\* OR newborn OR infant\*) NEAR/1 (weight\* OR underweight)):ti,ab OR ((SGA) NEAR/1 (neonate OR infant\* OR fetus\* OR newborn\*)):ti,ab OR (('small for date') NEAR/3 (baby\* OR babies OR infant\* OR neonat\* OR fetus\*)):ti,ab OR (('small for age') NEAR/3 (baby\* OR babies OR infant\* OR neonat\* OR fetus\*)):ti,ab OR ((fetal OR neonat\* OR infant\* OR fetus OR foetal OR 'in utero' OR intrauterine OR prenatal) NEAR/2 (growth) NEAR/2 (restrict\* OR retardation OR disorder\*)):ti,ab

AND

(('antenatal corticosteroid therapy'/de OR ACS:ti,ab OR

((antenatal\* OR prenatal\*) NEAR/3 (corticosteroid\* OR corticoid\* OR glucocorticoid\* OR glucorticoid\* OR steroid\* OR CST)):ti,ab OR (('adrenal cortex') NEAR/1 (hormone\*) NEAR/2 (prenatal\* OR antenatal\*)):ti,ab OR

((prenatal\* OR antenatal\*) NEAR/2 (Betamethasone OR adbeon OR becasone OR beprogel OR 'beta methason'

OR betacortril OR betadexamethasone OR betametason OR betamethasolone OR betamethazone OR betnasol OR betnelan OR betnesol OR betnovate OR betsolan OR betsolon OR betsoport OR celestan OR celestene OR celeston\*

OR cellestoderm OR cidoten OR dermobet OR diprolen OR flubenisolone OR flubenisolonvalerate OR methasone OR rinderon OR walacort)):ti,ab OR ((prenatal\* OR antenatal\*) NEAR/2 (Dexamethasone OR adrecort OR adrenocot OR 'aeroseb dex' OR aflucoson\* OR alfalyl OR anaflogistico OR arcodexan\* OR artrosone OR auxison OR azium OR bidexol OR calonat OR cebedex OR cetadexon OR colofeam OR corsona OR cortastat OR cortidex\* OR cortidexason OR cortidrona OR cortidrone OR cortisumman OR 'dacortina fuerte' OR 'dacortine fuerte' OR dalalone OR danasone OR 'de-sone la' OR decacortin OR decadeltosona OR decadeltosone OR decaderm OR decadion OR decadran OR decadron\* OR decaesadril OR decaject OR decameth\* OR decasone OR decaspray OR decasterolone OR decdan OR

decilone OR decofluor OR dectancyl OR dekcort OR delladec OR deltafluoren\* OR dergramin OR deronil OR desacort OR desacortone OR desadrene OR desalark OR desameton\* OR desigdron OR 'dexa cortisyl' OR 'dexa dabrosan' OR 'dexa korti' OR 'dexa scherosan' OR 'dexa scherozon' OR 'dexa scherozone' OR 'dexa p' OR 'dexacen 4' OR dexachel OR dexacort\* OR dexadabrosan OR dexadecadrol OR dexadrol OR dexagel OR dexagen OR dexahelvacort OR dexakorti OR dexalien OR dexalocal OR dexame OR dexamecortin OR dexameson\* OR dexametason\* OR dexamonozon OR dexan\* OR dexapot OR dexascheroson OR dexascherozon\* OR dexason\* OR dexinoral OR dexionil OR dexmethsone OR dexona OR dexone OR 'dexpak taperpak' OR dextelan OR dextrasone OR dexycu OR dezzone OR dibasona OR dexamethasone OR esacortene OR exadion OR exadione OR firmalone OR 'fluormethyl prednisolone' OR fluormethylprednisolon\* OR fluormone OR fluorocort OR fluorodelta OR fluoromethylprednisolone OR fortecortin OR gammacorten\* OR grosodexon\* OR hexadecadiol OR hexadecadrol OR hexadiol OR hexadrol OR isnacort OR isopto\* OR 'lokalison f' OR loverine OR luxazone OR marvidione OR maxidex OR mediamethasone OR megacortin OR mephameson\* OR metasolon\* OR methazon\* OR methylfluorprednisolone OR 'metisone lafi' OR mexasone OR millicorten\* OR mymethasone OR neoforderx OR neofordex OR nisomethasone OR novocort OR 'oftan dexa' OR optiocorten OR optiocortinol OR oradexan OR oradexon\* OR orgadron OR ozurdex OR pidexon OR policort OR posurdex OR 'predni f' OR 'prednisolone f' OR prodexona OR prodexone OR sanamethasone OR santenson OR santeson OR sawasone OR solurex OR spoloven OR sterasone OR thilodexine OR tobradex OR triamcimetil OR vexamet OR visumetazone OR visumethazone)):ti,ab)  
OR

((('prenatal drug exposure'/exp OR (prenatal\* OR antenatal\*):de OR ((prenatal\* OR antenatal\* OR fetal OR foetal OR intrauterine OR maternal) NEAR/1 ('drug exposure')):ti,ab) AND ('corticosteroid therapy'/exp OR 'betamethasone'/exp OR 'dexamethasone'/exp OR (('adrenal cortex') NEAR/1 (hormone\*)):ti,ab OR (Corticotherap\* OR corticosteroid\* OR corticoid\* OR Glucocorticoid\* OR glucorticoid\* OR Betamethasone OR adbeon OR becasone OR beprogel OR 'beta methason' OR betacortril OR betadexamethasone OR betametason OR betamethasolone OR betamethazone OR betnasol OR betnelan OR betnesol OR betnovate OR betsolan OR betsolon OR betsoport OR celestan OR celestene OR celeston\* OR cellestoderm OR cidoten OR dermobet OR diprolen OR flubenisolone OR flubenisolonvalerate OR methasone OR rinderon OR walacort OR Dexamethasone OR adrecort OR adrenocot OR 'aeroseb dex' OR aflucoson\* OR alfalyl OR anaflogistico OR arcodexan\* OR artrosone OR auxison OR azium OR bidexol OR calonat OR cebedex OR cetadexon OR colofom OR corsona OR cortastat OR cortidex\* OR cortidexason OR cortidrona OR cortidrone OR cortisumman OR 'dacortina fuerte' OR 'dacortine fuerte' OR dalalone OR danasone OR 'de-sone la' OR decacortin OR decadeltona OR decadeltonone OR decaderm OR decadion OR decadrans OR decadron\* OR decaesadriil OR decaject OR decameth\* OR decasone OR decaspray OR decasterolone OR decdan OR decilone OR decofluor OR dectancyl OR dekcort OR delladec OR deltafluoren\* OR dergramin OR deronil OR desacort OR desacortone OR desadrene OR desalark OR desameton\* OR desigdron OR 'dexa cortisyl' OR 'dexa dabrosan' OR 'dexa korti' OR 'dexa scherosan' OR 'dexa scherozon' OR 'dexa scherozone' OR 'dexa p' OR 'dexacen 4' OR dexachel OR dexacort\* OR dexadabrosan OR dexadecadrol OR dexadrol OR dexagel OR dexagen OR dexahelvacort OR dexakorti OR dexalien OR dexalocal OR dexame OR dexamecortin OR dexameson\* OR dexametason\* OR dexamonozon OR dexan\* OR dexapot OR dexascheroson OR dexascherozon\* OR dexason\* OR dexinoral OR dexionil OR dexmethsone OR dexona OR dexone OR 'dexpak taperpak' OR dextelan OR dextrasone OR dexycu OR dezzone OR dibasona OR dexamethasone OR esacortene OR exadion OR exadione OR firmalone OR 'fluormethyl prednisolone' OR fluormethylprednisolon\* OR fluormone OR fluorocort OR fluorodelta OR fluoromethylprednisolone OR fortecortin OR gammacorten\* OR grosodexon\* OR hexadecadiol OR hexadecadrol OR hexadiol OR hexadrol OR isnacort OR isopto\* OR 'lokalison f' OR loverine OR luxazone OR marvidione OR maxidex OR mediamethasone OR megacortin OR mephameson\* OR metasolon\* OR

methazon\* OR methylfluorprednisolone OR 'metisone lafi' OR mexasone OR millicorten\* OR mymethasone OR neoforderx OR neofordex OR nisomethasone OR novocort OR 'oftan dexta' OR opticorten OR opticortinol OR oradexan OR oradexon\* OR orgadron OR ozurdex OR pidexon OR policort OR posurdex OR 'predni f' OR 'prednisolone f' OR prodexona OR prodexone OR sanamethasone OR santenson OR santeson OR sawasone OR solurex OR spoloven OR sterasone OR thilodexine OR tobradex OR triamcimetil OR vexamet OR visumetazone OR visumethazone):ti,ab))) NOT ([animals]/lim NOT [humans]/lim)

### Cochrane

Date Searched: 6/11/19; 5/13/20

Applied Database Supplied Limits: n/a

Number of Results from each database in Cochrane

CDSR: 34; 27

\*0 for last year.

CENTRAL: 497; 498

\*35 found for 2019 -2020 and exported.

Cochrane Protocols : 2

Editorials: 1

Clinical Answers: 1

Search strategy was re-run on May 13, 2020. 8 additional records found (529 total).

Full Search Strategy:

1. [mh "fetal growth retardation"] OR [mh "Infant, Low Birth Weight"] OR [mh "Obstetric Labor, Premature"] OR [mh "Infant, Premature"] OR [mh "Birth Weight"] OR (birthweight\* OR prematuritas OR 'small for gestational age'):ti,ab OR ((premature OR preterm\*) NEAR/2 (birth\* OR labor\* OR labour\* OR delivery OR deliveries OR infant\* OR neonate\* OR newborn\* OR baby OR babies OR childbirth\* OR fetus\*)):ti,ab OR ((pre-mature OR pre-term\*) NEAR/2 (birth\* OR labor\* OR labour\* OR delivery OR deliveries OR infant\* OR neonate\* OR newborn\* OR baby OR babies OR childbirth\*)):ti,ab OR ((birth\* OR neonat\* OR newborn OR infant\*) NEAR/1 (weight\* OR underweight)):ti,ab OR ((SGA) NEAR/1 (neonate OR infant\* OR fetus\* OR newborn\*)):ti,ab OR (('small for date') NEAR/3 (baby\* OR babies OR infant\* OR neonat\* OR fetus\*)):ti,ab OR (('small for age') NEAR/3 (baby\* OR babies OR infant\* OR neonat\* OR fetus\*)):ti,ab OR ((fetal OR neonat\* OR infant\* OR fetus OR foetal OR 'in utero' OR intrauterine OR prenatal) NEAR/2 (growth) NEAR/2 (restrict\* OR retardation OR disorder\*)):ti,ab
2. ACS:ti,ab OR ((antenatal\* OR prenatal\*) NEAR/3 (corticosteroid\* OR corticoid\* OR glucocorticoid\* OR glucorticoid\* OR steroid\* OR CST)):ti,ab OR (('adrenal cortex') NEAR/1 (hormone\*) NEAR/2 (prenatal\* OR antenatal\*)):ti,ab OR ((prenatal\* OR antenatal\*) NEAR/2 (Betamethasone OR adbeon OR becasone OR beprogel OR "beta methason" OR betacortril OR betadexamethasone OR betametasone OR betamethasolone OR betamethazone OR betnasol OR betnelan OR betnesol OR betnovate OR betsolan OR betsolon OR betsoport OR celestan OR celestene OR celeston\* OR cellederm OR cidoten OR dermobet OR diprolen OR flubenisolone OR flubenisolonvalerate OR methasone OR rinderon OR walacort)):ti,ab OR ((prenatal\* OR antenatal\*) NEAR/2 (Dexamethasone OR adrecort OR adrenocot OR "aeroseb dex" OR aflucoson\* OR alfalyl OR anaflogistico OR arcodexan\* OR artrosone OR auxison OR azium OR bidexol OR calonat OR cebedex OR cetadexon OR colofam OR corsona OR cortastat OR cortidex\* OR cortidexason OR cortidrona OR cortidrone OR cortisumman OR

“dacortina fuerte” OR “dacortine fuerte” OR dalalone OR danasone OR “de-sone la” OR decacortin OR decadeltona OR decadeltonone OR decaderm OR decadion OR decadrone OR decadron\* OR decaesadriol OR decaject OR decameth\* OR decasone OR decaspray OR decasterolone OR decdan OR decilone OR decofluor OR dectancyl OR decaort OR delladec OR deltafluoren\* OR dergramin OR deronil OR desacort OR desacortone OR desadrene OR desalark OR desameton\* OR desigdrone OR “dexa cortisyl” OR “dexa dabrosan” OR “dexa korti” OR “dexa scherosan” OR “dexa scherozon” OR “dexa scherozone” OR “dexa p” OR “dexacen 4” OR dexachel OR dexacort\* OR dexadabrosone OR dexadecadrol OR dexadrol OR dexagel OR dexagen OR dexahelvacort OR dexakorti OR dexalien OR dexalocal OR dexame OR dexamecortin OR dexameson\* OR dexametason\* OR dexamonozone OR dexan\* OR dexapot OR dexascherosone OR dexascherozon\* OR dexason\* OR dixinoral OR dixinil OR dexmethsone OR dexona OR dexone OR “dexpak taperpak” OR dextelan OR dextrasonone OR dexycu OR dezone OR dibasona OR dexamethasone OR esacortene OR exadion OR exadione OR firmalone OR “fluormethyl prednisolone” OR fluormethylprednisolon\* OR fluormone OR fluorocort OR fluorodelta OR fluoromethylprednisolone OR fortocortin OR gammacorten\* OR grosodexon\* OR hexadecadiol OR hexadecadrol OR hexadiol OR hexadrol OR isnacort OR isopto\* OR “lokalison f” OR loverine OR luxazone OR marvidione OR maxidex OR mediamethasone OR megacortin OR mephameson\* OR metasolon\* OR methazon\* OR methylfluorprednisolone OR “metisone lafi” OR mexasone OR millicorten\* OR mymethasone OR neoforderx OR neofordex OR nisomethasone OR novocort OR “oftan dexa” OR opticorten OR opticortinol OR oradexan OR oradexon\* OR orgadrone OR ozurdex OR pidexon OR policort OR posurdex OR “predni f” OR “prednisolone f” OR prodexona OR prodexone OR sanamethasone OR santenson OR santeson OR sawasone OR solurex OR spoloven OR sterasone OR thilodexine OR tobradex OR triamcimetil OR vexamet OR visumetazone OR visumethazone):ti,ab

3. (prenatal\* OR antenatal\*):kw OR ((prenatal\* OR antenatal\* OR fetal OR foetal OR intrauterine OR maternal) NEAR/1 (“drug exposure”)):ti,ab
4. ([mh “adrenal cortex hormones”] OR [mh glucocorticoids] OR [mh betamethasone] OR [mh dexamethasone] OR (“adrenal cortex”) NEAR/1 (hormone\*)):ti,ab OR (Corticotherap\* OR corticosteroid\* OR corticoid\* OR Glucocorticoid\* OR glucorticoid\* OR Betamethasone OR adbeon OR becasone OR beprogel OR “beta methason” OR betacortril OR betadexamethasone OR betametasonone OR betamethasolone OR betamethazone OR betnasol OR betnelan OR betnesol OR betnovate OR betsolan OR betsolon OR betsoport OR celestan OR celestene OR celeston\* OR cellederm OR cidoten OR dermobet OR diprolen OR flubenisolone OR flubenisolonvalerate OR methasone OR rinderon OR walacort OR Dexamethasone OR adrecort OR adrenocot OR “aeroseb dex” OR aflucoson\* OR alfalyl OR anaflogistico OR arcodexan\* OR artrosone OR auxison OR azium OR bidexol OR calonat OR cebedex OR cetadexon OR colofam OR corsona OR cortastat OR cortidex\* OR cortidexason OR cortidrona OR cortidrone OR cortisumman OR “dacortina fuerte” OR “dacortine fuerte” OR dalalone OR danasone OR “de-sone la” OR decacortin OR decadeltona OR decadeltonone OR decaderm OR decadion OR decadrone OR decadron\* OR decaesadriol OR decaject OR decameth\* OR decasone OR decaspray OR decasterolone OR decdan OR decilone OR decofluor OR dectancyl OR decaort OR delladec OR deltafluoren\* OR dergramin OR deronil OR desacort OR desacortone OR desadrene OR desalark OR desameton\* OR desigdrone OR “dexa cortisyl” OR “dexa dabrosan” OR “dexa korti” OR “dexa scherosan” OR “dexa scherozon” OR “dexa scherozone” OR “dexa p” OR “dexacen 4” OR dexachel OR dexacort\* OR dexadabrosone OR dexadecadrol OR dexadrol OR dexagel OR dexagen OR dexahelvacort OR dexakorti OR dexalien OR dexalocal OR dexame OR dexamecortin OR dexameson\* OR dexametason\* OR dexamonozone OR dexan\* OR dexapot OR dexascherosone OR dexascherozon\* OR dexason\* OR dixinoral OR dixinil OR dexmethsone OR dexona OR dexone OR “dexpak taperpak” OR dextelan OR dextrasonone OR dexycu OR dezone OR dibasona OR dexamethasone OR esacortene OR exadion OR exadione

OR firmalone OR "fluormethyl prednisolone" OR fluormethylprednisolon\* OR fluormone OR fluorocort OR fluorodelta OR fluoromethylprednisolone OR fortecortin OR gammacorten\* OR grosodexon\* OR hexadecadiol OR hexadecadrol OR hexadiol OR hexadrol OR isnacort OR isopto\* OR "lokalison f" OR loverine OR luxazone OR marvidione OR maxidex OR mediamethasone OR megacortin OR mephameson\* OR metasolon\* OR methazon\* OR methylfluorprednisolone OR "metisone lafi" OR mexasone OR millicorten\* OR mymethasone OR neoforderx OR neofordex OR nisomethasona OR novocort OR "oftan dexta" OR optiocorten OR optiocortinol OR oradexan OR oradexon\* OR orgadrone OR ozurdex OR pidexon OR policort OR posurdex OR "predni f" OR "prednisolone f" OR prodexona OR prodexone OR sanamethasone OR santenson OR santeson OR sawasone OR solurex OR spoloven OR sterasone OR thilodexine OR tobradex OR triamcimetil OR vexamet OR visumetazone OR visumethazone) :

5. #3 AND #4
6. #5 OR #2
7. #6 AND #1

### Scopus

Date Searched: 6/11/19; 5/13/20

Applied Database Supplied Limits: n/a

Number of Results: 2778, 2911

Search strategy was re-run on May 13, 2020. 133 new results.

Full Search Strategy:

TITLE-ABS(birthweight\* OR prematuritas OR "small for gestational age" OR ((premature OR preterm\*) W/2 (birth\* OR labor\* OR labour\* OR delivery OR deliveries OR infant\* OR neonate\* OR newborn\* OR baby OR babies OR childbirth\* OR fetus\*)) OR ((pre-mature OR pre-term\*) W/2 (birth\* OR labor\* OR labour\* OR delivery OR deliveries OR infant\* OR neonate\* OR newborn\* OR baby OR babies OR childbirth\*)) OR ((birth\* OR neonat\* OR newborn OR infant\*) W/1 (weight\* OR underweight)) OR ((SGA) W/1 (neonate OR infant\* OR fetus\* OR newborn\*)) OR (("small for date") W/3 (baby\* OR babies OR infant\* OR neonat\* OR fetus\*)) OR (("small for age") W/3 (baby\* OR babies OR infant\* OR neonat\* OR fetus\*)) OR ((fetal OR neonat\* OR infant\* OR fetus OR foetal OR "in utero" OR intrauterine OR prenatal) W/2 (growth) W/2 (restrict\* OR retardation OR disorder\*))

AND

TITLE-ABS(ACS OR ((antenatal\* OR prenatal\*) W/3 (corticosteroid\* OR corticoid\* OR glucocorticoid\* OR glucorticoid\* OR steroid\* OR CST)) OR (("adrenal cortex") W/1 (hormone\*) W/2 (prenatal\* OR antenatal\*)) OR ((prenatal\* OR antenatal\*) W/2 (Betamethasone OR adbeon OR becasone OR beprogel OR "beta methason"

OR betacortril OR betadexamethasone OR betametason OR betamethasolone OR betamethazone OR betnasol OR betnelan OR betnesol OR betnovate OR betsolan OR betsolon OR betsopart OR celestan OR celestene OR celeston\*

OR cellestoderm OR cidoten OR dermobet OR diprolen OR flubenisolone OR flubenisolonvalerate OR methasone OR rinderon OR walacort)) OR ((prenatal\* OR antenatal\*) W/2 (Dexamethasone OR adrecort OR adrenocot OR "aeroseb dex" OR aflucoson\* OR alfalyl OR anaflogistico OR arcodexan\* OR artrosone OR auxison OR azium OR bidexol OR calonat OR cebedex OR cetadexon OR colofam OR corsona OR cortastat OR cortidex\* OR cortidexason OR cortidrona OR cortidrone OR cortisumman OR "dacortina fuerte" OR "dacortine fuerte" OR dalalone OR danasone OR "de-sona la" OR decacortin OR decadeltona OR decadeltonone OR decaderm OR decadion OR decadrone OR decadron\* OR

decaesadril OR decaject OR decameth\* OR decasone OR decaspray OR decasterolone OR decdan OR decilone OR decofluor OR dectancyl OR dekcort OR delladec OR deltafluoren\* OR dergramin OR deronil OR desacort OR desacortone OR desadrene OR desalark OR desameton\* OR desigdron OR "dexa cortisyl" OR "dexa dabrosan" OR "dexa korti" OR "dexa scherosan" OR "dexa scherozon" OR "dexa scherozone" OR "dexa p" OR "dexacen 4" OR dexachel OR dexacort\* OR dexadabrosan OR dexadecadrol OR dexadrol OR dexagel OR dexagen OR dexahelvacort OR dexakorti OR dexalien OR dexalocal OR dexame OR dexamecortin OR dexameson\* OR dexametason\* OR dexamonozon OR dexan\* OR dexapot OR dexascheroson OR dexascherozon\* OR dexason\* OR dixinoral OR dexionil OR dexmethsone OR dexona OR dexone OR "dexpak taperpak" OR dextelan OR dextrasone OR dexycu OR dezone OR dibasona OR dexamethasone OR esacortene OR exadion OR exadione OR firmalone OR "fluormethyl prednisolone" OR fluormethylprednisolon\* OR fluormone OR fluorocort OR fluorodelta OR fluoromethylprednisolone OR fortecortin OR gammacorten\* OR grosodexon\* OR hexadecadiol OR hexadecadrol OR hexadiol OR hexadrol OR isnacort OR isopto\* OR "lokalison f" OR loverine OR luxazone OR marvidione OR maxidex OR mediamethasone OR megacortin OR mephameson\* OR metasolon\* OR methazon\* OR methylfluorprednisolone OR "metisone lafi" OR mexasone OR millicorten\* OR mymethasone OR neoforderx OR neofordex OR nisomethasona OR novocort OR "oftan dexa" OR opticorten OR opticortinol OR oradexan OR oradexon\* OR orgadrone OR ozurdex OR pidexon OR policort OR posurdex OR "predni f" OR "prednisolone f" OR prodexona OR prodexone OR sanamethasone OR santenson OR santeson OR sawasone OR solurex OR spoloven OR sterasone OR thilodexine OR tobradex OR triamcimetil OR vexamet OR visumetazone OR visumethazone))) OR ((KEY(prenatal\* OR antenatal\*) OR TITLE-ABS((prenatal\* OR antenatal\* OR fetal OR foetal OR intrauterine OR maternal) W/1 ("drug exposure"))))

AND

TITLE-ABS(((("adrenal cortex") W/1 (hormone\*)) OR Corticotherap\* OR corticosteroid\* OR corticoid\* OR Glucocorticoid\* OR glucorticoid\* OR Betamethasone OR adbeon OR becasone OR beprogel OR "beta methason" OR betacortril OR betadexamethasone OR betametasone OR betamethasolone OR betamethazone OR betnasol OR betnelan OR betnesol OR betnovate OR betsolan OR betsolon OR betsopart OR celestan OR celestene OR celeston\* OR cellestoderm OR cidoten OR dermobet OR diprolen OR flubenisolone OR flubenisolonvalerate OR methasone OR rinderon OR walacort OR Dexamethasone OR adrecort OR adrenocot OR "aeroseb dex" OR aflucoson\* OR alfalyl OR anaflogistico OR arcodexan\* OR artrosone OR auxison OR azium OR bidexol OR calonat OR cebedex OR cetadexon OR colofeam OR corsona OR cortastat OR cortidex\* OR cortidexason OR cortidrona OR cortidrone OR cortisumman OR "dacortina fuerte" OR "dacortine fuerte" OR dalalone OR danasone OR "de-sone la" OR decacortin OR decadeltosona OR decadeltosone OR decaderm OR decadion OR decadran OR decadron\* OR decaesadril OR decaject OR decameth\* OR decasone OR decaspray OR decasterolone OR decdan OR decilone OR decofluor OR dectancyl OR dekcort OR delladec OR deltafluoren\* OR dergramin OR deronil OR desacort OR desacortone OR desadrene OR desalark OR desameton\* OR desigdron OR "dexa cortisyl" OR "dexa dabrosan" OR "dexa korti" OR "dexa scherosan" OR "dexa scherozon" OR "dexa scherozone" OR "dexa p" OR "dexacen 4" OR dexachel OR dexacort\* OR dexadabrosan OR dexadecadrol OR dexadrol OR dexagel OR dexagen OR dexahelvacort OR dexakorti OR dexalien OR dexalocal OR dexame OR dexamecortin OR dexameson\* OR dexametason\* OR dexamonozon OR dexan\* OR dexapot OR dexascheroson OR dexascherozon\* OR dexason\* OR dixinoral OR dexionil OR dexmethsone OR dexona OR dexone OR "dexpak taperpak" OR dextelan OR dextrasone OR dexycu OR dezone OR dibasona OR dexamethasone OR esacortene OR exadion OR exadione OR firmalone OR "fluormethyl prednisolone" OR fluormethylprednisolon\* OR fluormone OR fluorocort OR fluorodelta OR fluoromethylprednisolone OR fortecortin OR gammacorten\* OR grosodexon\* OR hexadecadiol OR hexadecadrol OR hexadiol OR



hexadrol OR isnacort OR isopto\* OR "lokalison f" OR loverine OR luxazone OR marvidione OR maxidex OR mediamethasone OR megacortin OR mephameson\* OR metasolon\* OR methazon\* OR methylfluorprednisolone OR "metisone lafi" OR mexasone OR millicorten\* OR mymethasone OR neoforderx OR neofordex OR nisomethasone OR novocort OR "oftan dexta" OR opticorten OR opticortinol OR oradexan OR oradexon\* OR orgadrone OR ozurdex OR pidexon OR policort OR posurdex OR "predni f" OR "prednisolone f" OR prodexona OR prodexone OR sanamethasone OR santenson OR santeson OR sawasone OR solurex OR spoloven OR sterasone OR thilodexine OR tobradex OR triamcimetil OR vexamet OR visumetazone OR visumethazone)) AND NOT KEY((Animals) AND NOT (Animals AND humans))

ClinicalTrials.gov

Date Searched: 6/11/19 ; 5/13/20

Number of Results: 35 ; 39

search was re-run on May 13, 2020 and 4 additional records were found.

in Expert search:

(Antenatal corticosteroids) AND (preterm OR Small for Gestational Age OR birth weight)

WHO ICTRP

Date Searched: 6/11/19 ; unavailable

Number of Results: 24

From advanced search in search portal:

Antenatal corticosteroid (in title)

AND

preterm OR small for gestational age OR birth weight (in condition)

OR

Antenatal corticosteroid (in intervention) recruitment status :

ALL
